# Supplementary material for: Transfer hydrogenation of acetophenone in an organic-aqueous biphasic system containing double long-chain surfactants
Source: Royal Society of Chemistry journal article supplement (doi:10.1039/c3ra43829e), 2013-11-14
Supplement: c3ra43829e.pdf [file c3ra43829e.pdf]

## Electronic Supplementary Information

### Transfer Hydrogenation of Acetophenone in Organic-Aqueous Biphasic System Containing Double Long-chain Surfactants

#### *Experimental*

The triphenylphosphinetrisulfonate ( $P(m-C_6H_4SO_3Na)_3$ , TPPTS) was prepared according to the method described in the literature.<sup>1</sup> Water-soluble ruthenium complex,  $RuCl_2(TPPTS)_2$ , was synthesized according to the literature.<sup>2,3</sup> Water, iso-propanol and acetophenone were commercial and degassed before use.

Cetyltrimethylammonium bromide (CTAB), Dihexadecyldimethylammonium bromide ( $DDAB_{16}$ ), sodium dodecyl sulfate (SDS) and polysorbate 80 (Tween 80) were commercial and without further purification. The double long-chain surfactants with different chain length were prepared according to the literature.<sup>4</sup> The surface tension of surfactant solutions was measured by the Kruss Surface Tensiometer K100.

The transfer hydrogenation was conducted in a Schlenk tube (10ml) with a magnetic stirrer. A typical procedure as follows: the reactor was flushed with argon three times, and then, the ruthenium catalyst, TPPTS, surfactant solution, KOH, water, iso-propanol and acetophenone were added into it respectively. After a given reaction time, the mixture was extracted with chloroform and the organic phase was washed with water, dried with  $MgSO_4$  and evaporated to dryness, and then detected by GC.

The composition of product was analyzed on an Agilent 6890 gas chromatograph equipped with a PEG-20M capillary column (30m×0.25mm×0.25mm) and flame ionization detector (FID).

#### **Synthesis of the double long-chain cationic surfactants**

1  $C_{16}H_{33}N(CH_3)_2C_2H_5Br$ : 3.3 ml (9.81mmol) of  $C_{16}H_{33}N(CH_3)_2$  and 1.3 ml (17.4mmol) of  $C_2H_5Br$  were performed with 80 ml of acetone as a solvent under argon atmosphere. The reaction was heated to 75°C and refluxed for 24 hours. The resulting products were extracted by ether and further purified by recrystallization from a mixture of acetone and ether. The yield was 3.31 g (89%). mp 208-212°C,  $^1H$  NMR( $CDCl_3$ , 400Hz):  $\delta$ : 0.881(3H, t), 1.258-1.64(31H, m), 3.405(6H, s), 3.517(2H, t), 3.723(2H, q) ppm.

2  $C_{16}H_{33}N(CH_3)_2C_4H_9Br$ : 2.6 ml (7.7mmol) of  $C_{16}H_{33}N(CH_3)_2$  and 1.5 ml (13.9mmol) of  $C_4H_9Br$  react with 80 ml acetone according to the same procedure as that followed for 1. Overall yield was 1.63 g (52%). mp 58-62°C,  $^1H$  NMR( $CDCl_3$ , 400Hz):  $\delta$ : 0.897-1.037(6H, t), 1.000-1.698(32H, m), 3.398(6H, s), 3.488(2H, t), 3.527(2H, q) ppm.

3  $C_{16}H_{33}N(CH_3)_2C_8H_{17}Br$ : 2.5 ml (7.4mmol) of  $C_{16}H_{33}N(CH_3)_2$  and 1.6 ml (9.2mmol) of  $C_8H_{17}Br$  react with 80 ml acetone according to the same procedure as that followed for 1. Overall yield was 0.78 g (23%). mp 163-165°C,  $^1H$  NMR( $CDCl_3$ , 400Hz):  $\delta$ : 0.883(6H, t), 1.231-1.699(40H, m), 3.401(6H, s), 3.535(4H, t) ppm.

4  $C_{16}H_{33}N(CH_3)_2C_{12}H_{25}Br$ : 3.1 ml (9.18mmol) of  $C_{16}H_{33}N(CH_3)_2$  and 2.5 ml (10.4mmol) of  $C_{12}H_{25}Br$  react with 80 ml acetone according to the same procedure as that followed for 1. Overall yield was 2.76 g (58%). mp 173-175°C,  $^1H$  NMR( $CDCl_3$ , 400Hz):  $\delta$ : 0.897(6H, t), 1.230-1.696(48H, m), 3.396(6H, s), 3.533(4H, t) ppm.

### References

- [1] H. Chen, H. C. Liu, Y. Z. Li, P. M. Chen and X. J. Li, *Chin. J. Mol. Catal.*, 1994, **8**, 124-130.
- [2] T. A. Stephenson and G. J. Wilkinson, *J. Inorg. Nucl. Chem.*, 1966, **28**, 945-956.
- [3] E. Fache, C. Santini, F. Senocq and J. M. Basset, *J. Mol. Catal.*, 1992, **72**, 331-336.
- [4] K. Hiramatsu, K. Kameyama, R. Ishiguro, M. Mori and H. Hayase, *Bull. Chem. Soc. Jpn.*, 2003, **76**, 1903-1910.
